# Supplementary material for: TgICMAP1 Is a Novel Microtubule Binding Protein in Toxoplasma gondii
Source: PubMed Central journal article supplement (PMC2758671; doi:10.1371/journal.pone.0007406), 2009-10-12
Supplement: pone.0007406.s001.pdf [file pone.0007406.s001.pdf]

**Table S1.**

| <b>Primer Name and Sequence:</b>                                                                                                                                                                                                 | <b>Used for the construction of:</b>                 |
|----------------------------------------------------------------------------------------------------------------------------------------------------------------------------------------------------------------------------------|------------------------------------------------------|
| S124: ATGCGGATCCATGGCAGATCTGACACTCGAGCCCCG<br>A125: ATCGCTTAAGTTACCACCAGCCCCAACTGGA ACTCTC                                                                                                                                       | pmin-eGFP-TgICMAP1                                   |
| S555: GCCGGCGAACGTGGCGAGA<br>A555: CGGATAAAGAGGCAGTCGAGGCG;<br>S556: GCCGCTCTAATCCCCCTCCACCGCGGTGT<br>A556: GAGGGGATTAGAGCGGCCGCCACCGC                                                                                           | pmin-eGFP-TgICMAP1-<br>minus-BamHI                   |
| S574: GCCATGGATCCGAGTCCGGACTTGTACAGCTC<br>A574: GACTCGGATCCATGGCAGATCTGACAC<br>S575: GGTACCGAGTCGTCATGTCTG<br>A575: CGCTTTAGTAGTGCGTTTCTGC                                                                                       | pmin-eGFP-<br>TgICMAP1FL_BamHIlinker.                |
| S552: TAGATTCAATTGTGAGCGGATAAC<br>A552: AGGCGGGCAAGAATGTG<br>S553: GAAAGCTTAAGTAGCTGAGCTTGGACTCCTGT<br>A553: GCTCAGCTACTTAAGCTTTCAAGAGCTGGCC<br>S554: GAGAATCCAACTAGCTTGGCGAGATTTTCAG<br>A554: CCAAGCTAGTTTGGATTCTACCAATAAAAAACG | pQE30-DIP13_AflII                                    |
| S552: TAGATTCAATTGTGAGCGGATAAC<br>A552: AGGCGGGCAAGAATGTG<br>S576: TCACGCTAGCGGATCCATGTCTGCTCAAGGC<br>A576: GGATCCGCTAGCGTGATGGTGATGGTGATGCG                                                                                     | pQE30-DIP13_AflII-NheI                               |
| BamHI-TgICMAP1C-S:<br>AGCGGATCCACGCTGGAGGCAAAAGTGAGTGAGC<br>AflII-TgICMAP1C-AS:<br>ATCGCTTAAGTTACCACCAGCCCCAACTGGA ACTCTC                                                                                                        | pQE30-His-FLAG-eGFP-<br>TgICMAP1 <sup>455-1231</sup> |
| pQE30 Forward: CCCGAAAAGTGCCACCTG<br>His-FLAG-NheI-AS:<br>ACGCTAGCCTTATCGTCGTCATCCTTGTAATCGTGATGGTGATGGTGATG                                                                                                                     | pQE30-His-FLAG-eGFP-<br>TgICMAP1 <sup>1-474</sup>    |
